# Supplementary material
Source: PubMed Central journal article supplement (PMC5520654)
Supplement: NIHMS876342-supplement-1.pdf [file NIHMS876342-supplement-1.pdf]

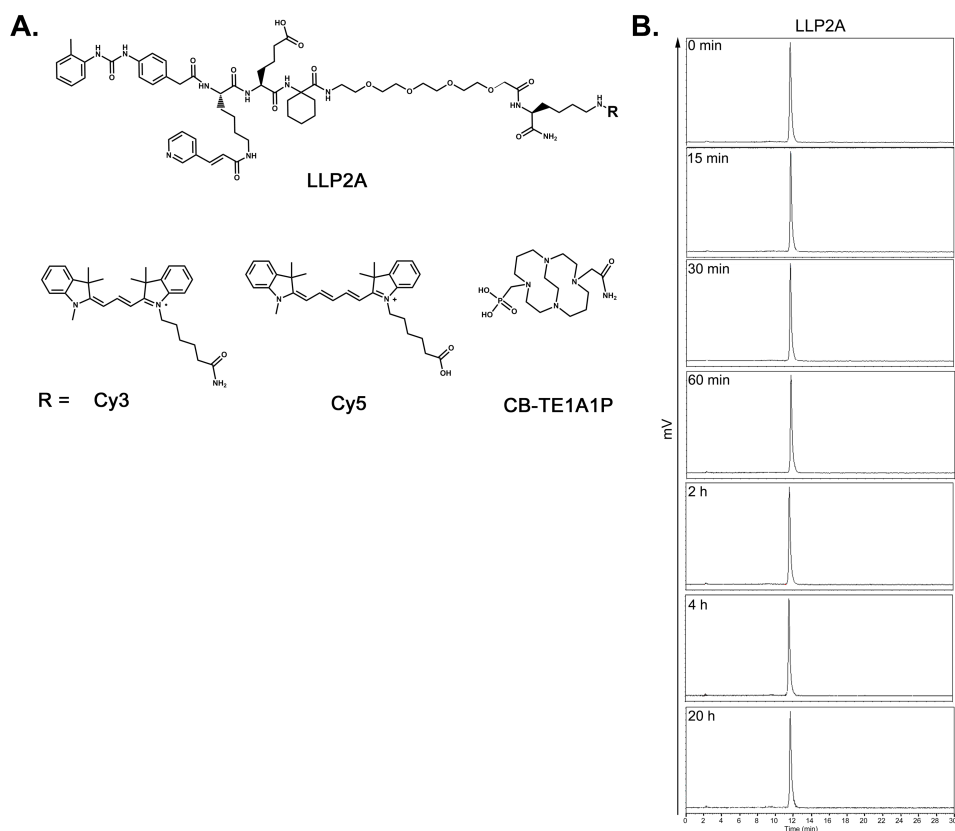

Supplemental Figure 1. Structure of LLP2A and stability of LLP2A in serum (A) Structures of LLP2A and bioconjugates with the fluorochromes Cy3 and Cy5, and the CB-TE1A1P chelator. (B) Stability of LLP2A-PEG4-CBTE1A1P- $^{64}\text{Cu}$  in macaque serum.  $^{64}\text{Cu}$ -LLP2A was incubated in 100% freshly prepared macaque serum at 37°C. At different time points 50  $\mu\text{L}$  of the mixture was taken and serum protein was precipitated with 100  $\mu\text{L}$  acetonitrile and centrifuged at 5000xg for 2 min. The supernatant analyzed using radio-HPLC on a C18 Jupiter column using a gradient from 5% to 100% acetonitrile in 20 minutes.  $^{64}\text{Cu}$ -LLP2A was stable in macaque serum for up to 20 hours.
